# Supplementary material
Source: Royal Society of Chemistry journal article supplement (doi:10.1039/d5fo05460e)
Supplement: d5fo05460e1.pdf [file d5fo05460e1.pdf]

Supplementary Table 1- Characteristics of the acute intervention studies investigating the effect of apples and apple-based products on markers of human health

| Reference and Country                              | Participants                                                          | Duration      | Study design                           | Intervention                                                                                                                                                                                                                                                                                                                                                                                                                                                                                                                                                                                                                                                                                                          | Apple cultivar | Control                                                                                                                                                                                                                                                                                                                                                                                                                                                                                                                                             |
|----------------------------------------------------|-----------------------------------------------------------------------|---------------|----------------------------------------|-----------------------------------------------------------------------------------------------------------------------------------------------------------------------------------------------------------------------------------------------------------------------------------------------------------------------------------------------------------------------------------------------------------------------------------------------------------------------------------------------------------------------------------------------------------------------------------------------------------------------------------------------------------------------------------------------------------------------|----------------|-----------------------------------------------------------------------------------------------------------------------------------------------------------------------------------------------------------------------------------------------------------------------------------------------------------------------------------------------------------------------------------------------------------------------------------------------------------------------------------------------------------------------------------------------------|
| Godycki-Cwirko et al., (2010) Poland <sup>33</sup> | 12 healthy non-smoker male subjects (age: 32 ± 5y; BMI: not reported) | Post-prandial | Double-blind placebo-controlled design | <p>Clear apple juice (1L)</p> <p><u>Composition:</u><br/>Water soluble pectic substances (0mg/L), Saccharose (4.7g/L), Glucose (28.7g/L), Fructose (90.8g/L), Ascorbic acid (0mg/L), Malic acid (3.7g/L), Citric acid (3.2g/L), Total polyphenols (270.4mg/L), Catechin and epicatechin (44mg/L), Oligomeric procyanidins (92.6mg/L), Phloridzin and phloretin xyloglucoside (45.5mg/L), Chlorogenic acid (58.4mg/L), p-Coumarylquinic acid (10.6mg/L), Quercetin glycosides (18.4mg/L), Quercetin (0.9mg/L)</p> <p>Cloudy apple juice (positive control, 1L)</p> <p><u>Composition:</u><br/>Water soluble pectic substances (833mg/L), Saccharose (7.1g/L), Glucose (28.4g/L), Fructose (88.6g/L), Ascorbic acid</p> | Sampion        | <p>Apple juice without polyphenols (placebo, 1L)</p> <p><u>Composition:</u><br/>Water soluble pectic substances (0mg/L), Saccharose (5.1g/L), Glucose (28g/L), Fructose (88.1g/L), Ascorbic acid (0mg/L), Malic acid (3.9g/L), Citric acid (2.6g/L), Total polyphenols (0mg/L), Catechin and epicatechin (0mg/L), Oligomeric procyanidins (0mg/L), Phloridzin and phloretin xyloglucoside (0mg/L), Chlorogenic acid (0mg/L), p-Coumarylquinic acid (0mg/L), Quercetin glycosides (0mg/L), Quercetin (0mg/L)</p> <p>Water (negative control, 1L)</p> |

(30.1mg/L), Malic acid (4g/L), Citric acid (3.1g/L), Total polyphenols (248mg/L), Catechin and epicatechin (52.1mg/L), Oligomeric procyanidins (81.6mg/L), Phloridzin and phloretin xyloglucoside (16.8mg/L), Chlorogenic acid (81.7mg/L), p-Coumaric acid (11.6mg/L), Quercetin glycosides (4.2mg/L), Quercetin (0mg/L)

Bondonno et al., (2012) Australia<sup>34</sup>

30 healthy adults (24 F, 6M; age: 47.3± 13.6y; BMI: 23.6± 3.4 kg/m<sup>2</sup>)

Post-prandial

Randomized, controlled, crossover design

Apple: High-flavonoid Cripps Pink apple active (apple flesh plus skin) and low-nitrate control (rice milk)

Control: Low-flavonoid apple control (apple flesh) and low-nitrate control (rice milk)

Composition :  
quercetin 184 mg, (-)-epicatechin 180 mg, less than 5 mg nitrate

Composition :  
less than 5 mg quercetin and (-)-epicatechin, less than 5 mg nitrate

Spinach: Low-flavonoid apple control (apple flesh) and nitrate-rich spinach active

Composition :  
quercetin and (-)-epicatechin less than 5 mg, polyphenols 75mg, nitrate 182 mg

|                                            |                                                                                                                              |               |                              |                                                                                                                                                                                                                                                                                            |                              |                          |
|--------------------------------------------|------------------------------------------------------------------------------------------------------------------------------|---------------|------------------------------|--------------------------------------------------------------------------------------------------------------------------------------------------------------------------------------------------------------------------------------------------------------------------------------------|------------------------------|--------------------------|
| Vieira et al., (2012) Brazil <sup>35</sup> | 9 healthy subjects (sex: F; age: 23.6 y (range, 21-27 y); BMI: 20.6 kg/m <sup>2</sup> (range, 19.0-23.7 kg/m <sup>2</sup> )) | Post-prandial | Randomized, crossover design | <p>Apple + spinach :<br/>High-flavonoid apple active (apple flesh plus skin) and nitrate-rich spinach active</p> <p><u>Composition :</u><br/>quercetin 184 mg, (-)-epicatechin 180 mg, polyphenols 75mg, nitrate 182 mg</p>                                                                | Golden Delicious or Catarina | Water as control (300mL) |
|                                            |                                                                                                                              |               |                              | <p><u>Composition (100mL):</u><br/>Total sugars 10.32, fructose 5.16g, glucose 1.55g, sucrose 3.61g, total phenolic 108.27mg GAE, total flavanols 16.47mg catechin, total anthocyanins ND, vitamin C 1.96mg, total antioxidant capacity (ABTS 359.63μmol TEAC, FRAP 182.9463μmol TEAC)</p> |                              |                          |
|                                            |                                                                                                                              |               |                              | <p>Apple juice Catarina (300mL; equivalent to 5 apples)</p>                                                                                                                                                                                                                                |                              |                          |
|                                            |                                                                                                                              |               |                              | <p><u>Composition:</u><br/>Total sugars 12.35, fructose 6.17g, glucose 1.03g, sucrose 5.15g, total phenolic 163.83mg GAE, total flavanols 30.86mg catechin,</p>                                                                                                                            |                              |                          |

|                                            |                                                                                                   |               |                                                                                                                       |                                                                                                                                                                                                                                                                                                                                                                                                                                                                                                                         |              |                                                            |
|--------------------------------------------|---------------------------------------------------------------------------------------------------|---------------|-----------------------------------------------------------------------------------------------------------------------|-------------------------------------------------------------------------------------------------------------------------------------------------------------------------------------------------------------------------------------------------------------------------------------------------------------------------------------------------------------------------------------------------------------------------------------------------------------------------------------------------------------------------|--------------|------------------------------------------------------------|
|                                            |                                                                                                   |               |                                                                                                                       | total anthocyanins<br>1.02mg cy-3-gal,<br>vitamin C 1.30mg,<br>total<br>antioxidant capacity<br>(ABTS 709.70µmol<br>TEAC, FRAP<br>306.25µmol TEAC)                                                                                                                                                                                                                                                                                                                                                                      |              |                                                            |
| Holland et al.,<br>(2013) UK <sup>36</sup> | 13 healthy subjects<br>(sex: 7F, 6M; age:<br>56.6 ± 6.4 y; BMI:<br>25.7 ± 2.7 kg/m <sup>2</sup> ) | Post-prandial | Double blind<br>(except for the<br>apple puree<br>treatment),<br>placebo-controlled,<br>four-phase<br>crossover trial | 1) 300 g apple purée<br>(2) 300 g flavoured<br>water containing low<br>flavanol apple extract<br>(3) 300 g flavoured<br>water containing high<br>flavanol apple extract                                                                                                                                                                                                                                                                                                                                                 | Not reported | 300g flavoured water<br><br>Composition:<br>No polyphenols |
|                                            |                                                                                                   |               |                                                                                                                       | Composition:<br>Apple purée<br>(-) epicatechin 70 mg,<br>(+)-catechin 6.1 mg,<br>procyanidins<br>200 mg, total<br>quercetin glycosides<br>5.7 mg, phloridzin<br>28.5 mg and<br>chlorogenic acid 102.6<br>mg<br><br>Drink (low flavanol<br>apple extract)<br>epicatechin 70 mg,<br>(+)-catechin 1.8 mg,<br>procyanidins<br>(flavanol-3-ol oligo-<br>and polymers) 62.8<br>mg, total quercetin<br>glycosides 7.1 mg,<br>phloridzin 3.2 mg and<br>chlorogenic acid 7.4<br>mg<br><br>Drink (high flavanol<br>apple extract) |              |                                                            |

|                                        |                                                                                         |               |                                          |                                                                                                                                                                                                                                                                                                                                                                                                                                                                                                                                                                                               |                             |                                                                                                                                                                                                                      |
|----------------------------------------|-----------------------------------------------------------------------------------------|---------------|------------------------------------------|-----------------------------------------------------------------------------------------------------------------------------------------------------------------------------------------------------------------------------------------------------------------------------------------------------------------------------------------------------------------------------------------------------------------------------------------------------------------------------------------------------------------------------------------------------------------------------------------------|-----------------------------|----------------------------------------------------------------------------------------------------------------------------------------------------------------------------------------------------------------------|
|                                        |                                                                                         |               |                                          | epicatechin 140 mg, (+)-catechin 3.6 mg, procyanidins (flavanol-3-ol oligo- and polymers) 125.6 mg, total quercetin glycosides 14.2 mg, phloridzin 6.4 mg and chlorogenic acid 14.8 mg                                                                                                                                                                                                                                                                                                                                                                                                        |                             |                                                                                                                                                                                                                      |
| Gasper et al., (2014) UK <sup>64</sup> | 25 healthy subjects (sex: 12F, 13M; age: 42 ± 11 y; BMI: 25.9 ± 4.2 kg/m <sup>2</sup> ) | Post-prandial | Randomized, three-phase crossover design | <p>High flavanol (HF) apple puree : Standard breakfast consisting of 2 slices of white toast (72 g) with spread (10 g) followed by either, 230 g apple puree containing 100 mg epicatechin)</p> <p><u>Composition:</u><br/>Total hydroxycinnamate–quinic acid esters 0.497 mg/g fresh weight puree; Total flavanols 2.020 mg/g; Total dihydrochalcones 0.067 mg/g; Total flavonols 0.066 mg/g</p> <p>Low flavanol (LF) apple puree: Standard breakfast consisting of 2 slices of white toast (72 g) with spread (10 g) followed by either, 230 g apple puree containing 25 mg epicatechin</p> | Golden Delicious, Mitchalin | <p>Aspirin (ASA): standard breakfast consisting of 2 slices of white toast (72 g) with spread (10 g) followed by either, aspirin (75 mg dispersed in 100 mL water)</p> <p><u>Composition:</u><br/>No polyphenols</p> |

|                                              |                                                                                                                |               |                                                      |                                                                                                                                                                                                                                                                                                                                     |        |                                       |
|----------------------------------------------|----------------------------------------------------------------------------------------------------------------|---------------|------------------------------------------------------|-------------------------------------------------------------------------------------------------------------------------------------------------------------------------------------------------------------------------------------------------------------------------------------------------------------------------------------|--------|---------------------------------------|
| Marakova et al., (2015) Latvia <sup>37</sup> | 6 healthy subjects with CVD and diabetes risk (sex: 6F; age: 45.3 ± 9.7 y; BMI: 27.3 ± 2.4 kg/m <sup>2</sup> ) | Post-prandial | Open-label, randomized, controlled, cross-over study | <u>Composition:</u><br>Total hydroxycinnamate–quinic acid esters, 0.138 mg/ g fresh weight puree; Total flavanols 1.037mg/g; Total dihydrochalcones, 0.055mg/g; Total flavonols 0.095mg/g                                                                                                                                           | Auksis | Glucose solution (50g)                |
|                                              |                                                                                                                |               |                                                      | <u>Composition:</u><br>Glucose 55.48±1.14g/kg, fructose 88.31±1.20g/kg, sucrose 9.65±0.15 g/kg, catechin 2.54±0.05g/kg, epicatechin 2.12 ±0.03g/kg, phloretin-2-O-D-xyloglucoside 1.40±0.02g/kg, phloresin 12.61±0.15g/kg, Chlorogenic acid 18.90±0.11g/kg, Quercetin glycosides 2.83±0.04g/kg, Water-soluble pectin 27.73±0.51g/kg |        | <u>Composition:</u><br>No polyphenols |

|                                                     |                                                                                                                |                         |                                                       |                                                                                                                                                                                                                                                                                                                   |                  |                                                                                                                                                                                                                                                                                       |
|-----------------------------------------------------|----------------------------------------------------------------------------------------------------------------|-------------------------|-------------------------------------------------------|-------------------------------------------------------------------------------------------------------------------------------------------------------------------------------------------------------------------------------------------------------------------------------------------------------------------|------------------|---------------------------------------------------------------------------------------------------------------------------------------------------------------------------------------------------------------------------------------------------------------------------------------|
| Wruss et al., (2015) Austria <sup>38</sup>          | 35 healthy subjects (sex:20F, 15M; age: range 19-42y; BMI: not reported)                                       | Post-prandial           | Non-randomized, non-controlled                        | Unfiltered apple juice (500mL)<br><br><u>Composition:</u><br>Glucose 13g, Fructose 40 g, Total polyphenols 1.08g                                                                                                                                                                                                  | Mix of varieties | -                                                                                                                                                                                                                                                                                     |
| Erickson et al., (2017) United States <sup>39</sup> | 40 healthy subjects (sex: not reported; age: 22.7±4.2y; BMI: 23.4±2.8 kg/m <sup>2</sup> )                      | Post prandial           | Randomized, double-blind, controlled crossover design | Apple juice (12 oz)<br><br><u>Composition:</u><br>Total sugars (38 g/12oz); sorbitol (1.5g/12oz)                                                                                                                                                                                                                  | Not reported     | White grape juice (12 oz)<br><br><u>Composition:</u><br>Total sugars (52.5 g/12oz); sorbitol (0g/12oz)                                                                                                                                                                                |
| Bondonno et al., (2018) Australia <sup>65</sup>     | 30 healthy subjects with cardiovascular risk (10M, 20F; age: 57.8 ± 10.6y; BMI: 27.5 ± 3.9 kg/m <sup>2</sup> ) | Post-prandial + 4 weeks | Randomised, controlled, cross-over design             | High-flavonoid apple (HFA) (1 whole apple plus the skin + 1 apple blended with water)<br><br><u>Composition :</u><br>total phenolic compounds (306 mg/day); total quercetin glucosides (195.3mg/day) ; Epicatechin (48.0 mg/day); Phloridzin (5.1 mg/day); Chlorogenic acid (52.1mg/day); anthocyanins (6 mg/day) | Cripps Pink      | Low-flavonoid apple (LFA) (1 Cripps Pink apple blended with water)<br><br><u>Composition:</u><br>Total phenolic compounds (92 mg/day); total quercetin glucosides (12.5mg/day) ; Epicatechin (25.2 mg/day); Phloridzin (2.2 mg/day); Chlorogenic acid (52.1mg/day); anthocyanins (ND) |

|                                                    |                                                                                                          |               |                                         |                                                                                                                                                                                                                                                                                                                                                                                                                                                   |              |                                                                                                                                                                                                                                                                                                                                                                                                                                      |
|----------------------------------------------------|----------------------------------------------------------------------------------------------------------|---------------|-----------------------------------------|---------------------------------------------------------------------------------------------------------------------------------------------------------------------------------------------------------------------------------------------------------------------------------------------------------------------------------------------------------------------------------------------------------------------------------------------------|--------------|--------------------------------------------------------------------------------------------------------------------------------------------------------------------------------------------------------------------------------------------------------------------------------------------------------------------------------------------------------------------------------------------------------------------------------------|
| Sansone et al., (2018) United States <sup>40</sup> | 21 healthy, normal-weight subjects (sex: 20F, 1M; age: 26.8 ± 4.7 y; BMI: 22.5 ± 2.2 kg/m <sup>2</sup> ) | Post-prandial | Randomized, crossover design            | Dried apple (equivalent to 55g carbohydrates) + water (220 mL)                                                                                                                                                                                                                                                                                                                                                                                    | Not reported | Muffin (equivalent to 55g carbohydrates) + water (220 mL)                                                                                                                                                                                                                                                                                                                                                                            |
|                                                    |                                                                                                          |               |                                         | <p><u>Composition:</u><br/>Calories (225 kcal), fat (0g), carbohydrates (55g), protein (0.8g), fiber (7g), ascorbic acid (1195.4µg equivalent/g), total phenolics (732µg gallic acid equivalent/g), total flavonoids (172 µg catechin equivalent/g), ferrous ion chelating activity (1718.9µg EDTA equivalent/g), ferric reducing power (1195.4µg ascorbic acid equivalent/g), ABTS radical scavenging activity (464.9µg Trolox equivalent/g)</p> |              | <p><u>Composition:</u><br/>Calories (241 kcal), fat (0g), carbohydrates (55g), protein (4g), fiber (0g), ascorbic acid (217.2µg equivalent/g), total phenolics (0µg gallic acid equivalent/g), total flavonoids (0 µg catechin equivalent/g), ferrous ion chelating activity (240.4µg EDTA equivalent/g), ferric reducing power (217.2µg ascorbic acid equivalent/g), ABTS radical scavenging activity (0µg Trolox equivalent/g)</p> |
| White et al., (2018) New Zealand <sup>41</sup>     | 64 healthy subjects                                                                                      | Post-prandial | Randomized, controlled, parallel design | Large apple serving (2 apples, 410g)                                                                                                                                                                                                                                                                                                                                                                                                              | Royal Gala   | Control treatment Soda water (600mL) containing 26.7g glucose                                                                                                                                                                                                                                                                                                                                                                        |
|                                                    | Apple group (n=23; sex:15F, 5M; age:22±6y; BMI: 23±4kg/m <sup>2</sup> )                                  |               |                                         | <p><u>Composition :</u><br/>Fructose 26.7g, (21.3 g free fructose, 4.5 g free glucose), Sucrose 10.7g (5.35 g glucose and 5.35 g fructose)</p>                                                                                                                                                                                                                                                                                                    |              | Control treatment Soda water (600mL) containing 26.7g fructose                                                                                                                                                                                                                                                                                                                                                                       |
|                                                    | Apple juice group (n=21; sex:15F, 5M; age:24±7y; BMI: 23±3kg/m <sup>2</sup> )                            |               |                                         | Small serving (1 apple 205g)                                                                                                                                                                                                                                                                                                                                                                                                                      |              |                                                                                                                                                                                                                                                                                                                                                                                                                                      |
|                                                    | Control group (n=20; sex:15F, 5M; age:21±2y; BMI:                                                        |               |                                         | <p><u>Composition:</u><br/>Half of the large</p>                                                                                                                                                                                                                                                                                                                                                                                                  |              |                                                                                                                                                                                                                                                                                                                                                                                                                                      |

23±2kg/m<sup>2</sup> )

serving

Large juice serving  
(340mL)

Composition :

Free fructose 25.2 g,  
free glucose 7.8 g,  
sucrose 3.1 g  
(comprising 1.55 g  
glucose and 1.55 g  
fructose)

Small juice serving  
(170mL)

Composition:

Half of the full serving

Lu et al.,  
(2019)  
China<sup>42</sup>

18 healthy young  
subjects (sex: F; age:  
23.6±1.1y; BMI:  
20.3±2.6 kg/m<sup>2</sup>

Post-prandial

Randomized  
crossover design

Co-ingestion of apple  
and rice (A+R ;  
142.8g +115.7g  
Polished rice)

Red fuji

Glucose solution

Composition :

Energy 200kcal, 50g glucose

Rice meal (176g Polished  
rice)

Composition :

Energy 228kcal, Starch 50g,  
Protein 6.2g, Fat 0.5g,  
Dietary fiber 0.7g

Composition :

Energy 227kcal,  
Starch 35g, Glucose  
6.7g, Fructose 8.3g,  
Protein 4.7g, Fat 0.9g,  
Dietary fiber 1.4g

Apple preload and rice  
(PA+R ; 142.8g  
+115.7g Polished rice)

Rice (115g Polished rice)  
with sugar solution preload  
(same sugar profile as in  
apple) (PSS+R)

Composition :

Energy 227kcal,  
Starch 35g, Glucose  
6.7g, Fructose 8.3g,  
Protein 4.7g, Fat 0.9g,  
Dietary fiber 1.4g

Composition :

Energy 220.8kcal, Starch  
35g, Glucose 6.7g, Fructose  
8.3g, Protein 4.3g, Fat 0.4g,  
Dietary fiber 0.5g

|                                               |                                                                                 |               |                                  |                                                                                                                                                                                                                                                                                                                        |          |                                                                                                                                                                |
|-----------------------------------------------|---------------------------------------------------------------------------------|---------------|----------------------------------|------------------------------------------------------------------------------------------------------------------------------------------------------------------------------------------------------------------------------------------------------------------------------------------------------------------------|----------|----------------------------------------------------------------------------------------------------------------------------------------------------------------|
| Zhao et al.,<br>(2020)<br>China <sup>43</sup> | 15 subjects (Sex: F;<br>age: 23.6±1.1y;<br>BMI: 20.3±1.6<br>kg/m <sup>2</sup> ) | Post-prandial | Randomised,<br>crossover, design | Dried apple + rice<br>(DA+R) (20.9g dried<br>apple and rice 115.7g)                                                                                                                                                                                                                                                    | Red Fuji | Glucose<br>(50.0 g of Glucolin<br>dissolved in 203 g of water)                                                                                                 |
|                                               |                                                                                 |               |                                  | <p><u>Composition:</u><br/>Energy 935.6 kj,<br/>Starch 35g, Sucrose<br/>1.9g, Glucose 5.0g,<br/>Fructose 8.1g, Protein<br/>4.9g, Fat 0.4g, Dietary<br/>fiber 1.0g, Tannin<br/>778.08 mg TAE/100g<br/>DA, total polyphenols<br/>437.14 mg GAE/100g,<br/>total flavone 540.37<br/>mg GAE/100g, pectin<br/>4.30g/100g</p> |          | <p><u>Composition:</u><br/>Energy content (837.4 kj)</p>                                                                                                       |
|                                               |                                                                                 |               |                                  | Preload dried apple +<br>rice (PDA+R) (20.9g<br>dried apples and rice,<br>115.7g)                                                                                                                                                                                                                                      |          | Rice (176 g Polished rice)                                                                                                                                     |
|                                               |                                                                                 |               |                                  | <p><u>Composition:</u><br/>Energy 935.6 kj,<br/>Starch 35g, Sucrose<br/>1.9g, Glucose 5.0g,<br/>Fructose 8.1g, Protein<br/>4.9g, Fat 0.4g, Dietary<br/>fiber 1.0g, Tannin<br/>778.08 mg TAE/100g<br/>DA, total polyphenols<br/>437.14 mg GAE/100g,<br/>total flavone 540.37<br/>mg GAE/100g, pectin<br/>4.30g/100g</p> |          | <p><u>Composition:</u><br/>Energy 957.8 kj, Starch 50g,<br/>Protein 6.2g, Fat 0.5g,<br/>Dietary fiber 0.7g</p>                                                 |
|                                               |                                                                                 |               |                                  | Vinegar, dried apple +<br>rice (VDA+R) (30g<br>vinegar, 20.9g dried<br>apples and rice,<br>115.7g)                                                                                                                                                                                                                     |          | PSS+R (preload sugar<br>solution + rice)                                                                                                                       |
|                                               |                                                                                 |               |                                  | <p><u>Composition:</u></p>                                                                                                                                                                                                                                                                                             |          | <p><u>Composition :</u><br/>Energy 924.7 kj, Starch 35g,<br/>Sucrose 1.9g, Glucose 5.0g,<br/>Fructose 8.1g, Protein 4.3g,<br/>Fat 0.4g, Dietary fiber 0.5g</p> |

|                                                     |                                                                                                                                 |               |                                           |                                                                                                                                                                                                                                                                              |                 |                                                                                                                                                                                                                                      |
|-----------------------------------------------------|---------------------------------------------------------------------------------------------------------------------------------|---------------|-------------------------------------------|------------------------------------------------------------------------------------------------------------------------------------------------------------------------------------------------------------------------------------------------------------------------------|-----------------|--------------------------------------------------------------------------------------------------------------------------------------------------------------------------------------------------------------------------------------|
|                                                     |                                                                                                                                 |               |                                           | Energy 974.5 kj,<br>Starch 35g, Sucrose<br>1.9g, Glucose 5.0g,<br>Fructose 8.1g, Protein<br>5.5g, Fat 0.4g, Dietary<br>fiber 1.0g, Tannin<br>778.08 mg TAE/100g<br>DA, total polyphenols<br>437.14 mg GAE/100g,<br>total flavone 540.37<br>mg GAE/100g, pectin<br>4.30g/100g |                 |                                                                                                                                                                                                                                      |
| Lin et al.,<br>(2020)<br>Canada <sup>44</sup>       | 26 healthy<br>overweight/obese<br>subjects<br>(17F, 9M; age:<br>45.5±3.1 y (sem);<br>BMI: 34.1± 1.2<br>kg/m <sup>2</sup> (sem)) | Post-prandial | Randomised,<br>crossover design           | Oral fat tolerance test<br>meal (500 mL) +<br>apples (200 g)<br><br><u>Composition :</u><br>Energy content<br>(906.7–1638 kcal), Fat<br>(71.6–154g), Sugars<br>(41–42), Protein<br>(15.8g),<br>Acetaminophen (1.5g),<br>Pectin (2.2g), Total<br>polyphenols (200mg)          | Gala            | Oral fat tolerance meal (500<br>mL)<br><br><u>Composition :</u><br>Energy content (792.7–1524<br>kcal), Fat (71.6–154g),<br>Sugars (20.3–21.5g), Protein<br>(14.6g), Acetaminophen<br>(1.5g), Pectin (0g), Total<br>polyphenols (0g) |
| Cheng et al.,<br>(2022)<br>China <sup>45</sup>      | 18 healthy subjects<br>(12F, 6M; age:<br>22.5±2.2 y; BMI:<br>20.7± 1.72 kg/m <sup>2</sup> )                                     | Post-prandial | Randomized,<br>crossover design           | Apple (222g of flesh)<br><br><u>Composition:</u><br>1g (fructose 0.110 g<br>(free fructose 0.096 g,<br>glucose 0.041 g,<br>sucrose 0.0311 g)                                                                                                                                 | Red Fuji apples | Pure fructose powder (25g)                                                                                                                                                                                                           |
| Pushpass et<br>al., (2023)<br>Ireland <sup>66</sup> | 61 volunteers (sex:<br>46F, 15M ; age:<br>52±12 y; BMI<br>24.8±3.4 kg/m <sup>2</sup> )                                          | Post-prandial | 4 arms,<br>randomized,<br>parallel design | Apple treatment (2<br>Renetta Canada apples<br>with 2 placebo<br>capsules) consumed<br>daily for breakfast<br>(high fat chocolate<br>drink)                                                                                                                                  | Renetta Canada  | Control treatment<br>(Cornflakes 40 g with 180<br>mL semi-skimmed milk and<br>2 placebo capsules)<br>consumed daily for breakfast<br>(high fat chocolate drink)                                                                      |

---

Composition:

Apple:  
(Energy 234kcal,  
Carbohydrates 63.5g,  
(sugars 44g), Protein  
1.1g, Fat 0.7g, Fiber  
8.5g, vitamin C 21mg,  
sum of all individual  
polyphenols and  
oligomeric PAs (DP >  
2) 990 mg per daily  
portion (mainly  
oligomeric PAs and  
chlorogenic acid))

Test Breakfast Apples:  
(Energy 845kcal,  
Carbohydrates 88.8g,  
(sugars 69g), Protein  
19.3g, Fat 50.1g, Fiber  
8.5g)

Composition:

Test Breakfast Control:  
(Energy 852kcal,  
Carbohydrates 86g, (sugars  
46.6g), Protein 19.2g, Fat  
50.3g, Fiber 1.4g)

Probiotic treatment  
(Cornflakes 40g with 180  
mL semi-skimmed milk and  
2 probiotic capsules  
containing the BSH positive  
strain of *L. reuteri* NCIMB  
30242, >2.5 billion CFU per  
capsule) consumed daily for  
breakfast (high fat chocolate  
drink)

Composition:

Test Breakfast Probiotic:  
(Energy 852kcal,  
Carbohydrates 86g, (sugars  
46.6g), Protein 19.2g, Fat  
50.3g, Fiber 1.4g)

Oats treatment  
(Jumbo whole rolled oats 40  
g with 180 mL semi-  
skimmed milk and 2  
placebo capsules) consumed  
daily for breakfast (high fat  
chocolate drink)

Composition:

Test Breakfast Oats:  
(Energy 864kcal,  
Carbohydrates 88.1g,  
(sugars 63.1g), Protein  
19.8g, Fat 49.6g, Fiber 3.6g)

Supplementary Table 2- Characteristics of the medium-long term intervention studies investigating the effect of apples and apple-based products on markers of human health

| Reference and Country                                | Participants                                                                                                                     | Duration | Study design                                 | Intervention                                                                                                                                                                                                                                                                                                                                                                                                                                                                                                                                                               | Apple cultivar                                                            | Control |
|------------------------------------------------------|----------------------------------------------------------------------------------------------------------------------------------|----------|----------------------------------------------|----------------------------------------------------------------------------------------------------------------------------------------------------------------------------------------------------------------------------------------------------------------------------------------------------------------------------------------------------------------------------------------------------------------------------------------------------------------------------------------------------------------------------------------------------------------------------|---------------------------------------------------------------------------|---------|
| Remington et al., (2010) United States <sup>46</sup> | 21 institutionalized individuals with moderate-to severe Alzheimer Disease (sex: not reported; age: 82 + 5 y; BMI: not reported) | 1 month  | Pre-to-post intervention                     | 2 4-oz glasses of apple juice per day<br><br><u>Composition:</u><br>not reported                                                                                                                                                                                                                                                                                                                                                                                                                                                                                           | Not reported                                                              | None    |
| Auclair et al., (2010) France <sup>47</sup>          | 30 hypercholesterolemic volunteers (sex: not reported; age: 52.6±5.5 y, BMI: 25.7±2.6 kg/m <sup>2</sup> )                        | 4 weeks  | Randomized, double-blinded, crossover design | two bags of lyophilized apples per day, corresponding approximately to 2 fresh apples of 135 g<br><br><u>Composition:</u><br>Low polyphenol apple (Fibers 3.93g, procyanidins 78mg, total hydroxycinnamic acid 11mg, total flavan-3-ol-monomers 8mg, total dihydrochalcones 7.3mg, total flavonols 1mg, nitrogen 39mg, starch 19 mg, glucose 1.7g, fructose 7.80g, sucrose 3.8g, malic acid 386mg)<br><br>High polyphenol apple (Fibers 3.87g, procyanidins 521mg, total hydroxycinnamic acid 126mg, total flavan-3-ol-monomers 55mg, total dihydrochalcones 12.4mg, total | Golden Delicious (low polyphenols)<br><br>Marie M nard (high polyphenols) | None    |

|                                                   |                                                                                                                                                                                                                                             |           |                                               |                                                                                                                                                                                                                                                                                                                             |                  |                                                                                                                                                                                                                                                                                                                   |
|---------------------------------------------------|---------------------------------------------------------------------------------------------------------------------------------------------------------------------------------------------------------------------------------------------|-----------|-----------------------------------------------|-----------------------------------------------------------------------------------------------------------------------------------------------------------------------------------------------------------------------------------------------------------------------------------------------------------------------------|------------------|-------------------------------------------------------------------------------------------------------------------------------------------------------------------------------------------------------------------------------------------------------------------------------------------------------------------|
|                                                   |                                                                                                                                                                                                                                             |           |                                               | flavonols 6.3mg,<br>nitrogen 40mg, starch<br>600mg, glucose<br>1.66g, fructose 7.52g,<br>sucrose 3.74g, malic<br>acid 220mg)                                                                                                                                                                                                |                  |                                                                                                                                                                                                                                                                                                                   |
| Shinohara et al.,<br>(2010) Japon <sup>48</sup>   | 8 healthy male subjects<br>(age range: 21-60y;<br>BMI: not reported)                                                                                                                                                                        | 2 weeks   | Pre-to-post<br>intervention                   | 2 apples/day (amount<br>not reported)                                                                                                                                                                                                                                                                                       | not reported     | None                                                                                                                                                                                                                                                                                                              |
| Vafa et al. (2011)<br>Iran <sup>49</sup>          | 46 hyperlipidemic,<br>overweight men<br><br>Intervention group<br>(N=23)<br>Age: 41.08 ± 4.19 y;<br>BMI: 27.02 ± 1.39<br>kg/m <sup>2</sup><br><br>Control group<br>(N= 23)<br>Age: 41.65 ± 3.79y;<br>BMI: 26.72 ± 1.83<br>kg/m <sup>2</sup> | 8 weeks   | Randomized,<br>controlled, parallel<br>design | Apple (300 g)<br><br><u>Composition:</u><br>Total polyphenols 485<br>mg/kg and fibers 4.03<br>g/100g                                                                                                                                                                                                                        | Golden delicious | Regular diet<br><br><u>Composition:</u><br>n.a.                                                                                                                                                                                                                                                                   |
| Barth et al., (2012)<br>Germany <sup>50</sup>     | 68 overweight and<br>obese subjects (sex:<br>not reported; age: 23-<br>69 y; BMI: >27 kg/m <sup>2</sup> )                                                                                                                                   | 4 weeks   | Randomized,<br>controlled, parallel<br>design | Polyphenol-rich<br>cloudy apple juice<br>(CloA) (750 mL)<br><br><u>Composition:</u><br>Glucose 21.2g/L;<br>Fructose 67g/L;<br>Saccharose 36.2g/L;<br>L-malic acid 9.8 g/L;<br>Citric acid 0.1 g/L;<br>Ascorbic acid 311<br>mg/L; Potassium 1217<br>mg/L; Calcium 68<br>mg/L; Magnesium<br>57mg/L; Total<br>phenols 1070mg/L | Not reported     | Isocaloric control<br>beverage<br>(CB) (750 mL)<br><br><u>Composition:</u><br>Glucose 21.4g/L;<br>Fructose 63.8g/L;<br>Saccharose 32.4g/L;<br>L-malic acid 5.9 g/L;<br>Citric acid 2.6 g/L;<br>Ascorbic acid 253<br>mg/L; Potassium<br>1023 mg/L; Calcium<br>57 mg/L; Magnesium<br>61mg/L; Total<br>phenols 0mg/L |
| Chai et al. (2012)<br>United States <sup>51</sup> | 100 healthy<br>postmenopausal                                                                                                                                                                                                               | 12 months | Randomized,<br>controlled, parallel           | Dried apples (75g)                                                                                                                                                                                                                                                                                                          | Not reported     | Dried plum (100g)                                                                                                                                                                                                                                                                                                 |

|                                                      | women                                                                                                                                                                                                                                                                                              |         | design                                               | <u>Composition :</u><br>Energy 240 Kcal;<br>Total carbohydrates<br>58.5g;<br>Protein 1.5g;<br>Fat 0.43g ;<br>Fiber 6g                                                                                                                                                                                             |                                                 | <u>Composition:</u><br>Energy 239 Kcal;<br>Total carbohydrates<br>62.7g;<br>Protein 2.61g;<br>Fat 0.52g ;<br>Fiber 7.10g |
|------------------------------------------------------|----------------------------------------------------------------------------------------------------------------------------------------------------------------------------------------------------------------------------------------------------------------------------------------------------|---------|------------------------------------------------------|-------------------------------------------------------------------------------------------------------------------------------------------------------------------------------------------------------------------------------------------------------------------------------------------------------------------|-------------------------------------------------|--------------------------------------------------------------------------------------------------------------------------|
|                                                      | <p>Intervention group<br/>(N=45)<br/>(age: 55.6 ± 5.0 y;<br/>BMI: 24.8<br/>± 4.1 kg/m<sup>2</sup>)</p> <p>Control group<br/>(N= 55)<br/>Age: 57.5 ± 4.01y;<br/>BMI: 24.9 ± 4.6 kg/m<sup>2</sup>)</p>                                                                                               |         |                                                      |                                                                                                                                                                                                                                                                                                                   |                                                 |                                                                                                                          |
| Zhao et al., (2013)<br>USA <sup>52</sup>             | <p>51 healthy subjects</p> <p>Apples group (n=17;<br/>sex: 14F, 3M; age:<br/>49±4y; BMI: not<br/>reported)</p> <p>Apple polyphenols<br/>group (n=16; sex: 12F,<br/>4M; age: 49±4y; BMI:<br/>not reported)</p> <p>Placebo group (n=18;<br/>sex: 13F, 5M; age:<br/>46±4y; BMI: not<br/>reported)</p> | 4 weeks | 3-arm, randomized,<br>controlled, parallel<br>design | <p>Apple (1 per day; an<br/>equal mixture of two<br/>varieties)</p> <p><u>Composition:</u><br/>Polyphenols 194 mg<br/>/day</p> <p>Apple polyphenol<br/>extract (two<br/>capsules/day)</p> <p><u>Composition:</u><br/>Polyphenols 194 mg<br/>/day</p>                                                              | Red Delicious and<br>Golden Delicious<br>apples | <p>Placebo (two<br/>capsules/day)</p> <p><u>Composition:</u><br/><br/>650 mg gelatin per<br/>capsule</p>                 |
| Ravn-Haren<br>et al. (2013)<br>Denmark <sup>53</sup> | 23 healthy subjects<br>(sex: 9M/14F; age:<br>36.2 ± 17.9 y; BMI:<br>22.3 ± 2.59 kg/m <sup>2</sup> )                                                                                                                                                                                                | 4 weeks | Randomised, single-<br>blinded,<br>crossover study   | <p>Apples (550g/day)</p> <p><u>Composition:</u><br/>Total polyphenols 239<br/>mg/day; Catechin 5.1<br/>mg, Epicatechin 60<br/>mg, Procyanidin<br/>dimers 81 mg,<br/>Phloretin<br/>xyloglucoside 6.2 mg<br/>Phloridzin 6.6 mg,<br/>Chlorogenic acid 36<br/>mg, p-<br/>coumaroylquinic acid<br/>4 mg, Quercetin</p> | Shanpion                                        | Restricted diet                                                                                                          |

glycosides 41 mg,  
Quercetin 0 mg, Total  
pectin 2.87 g/day

Apple pomace  
(22mg/day)

Composition:

Total polyphenols 75  
mg/day; Catechin 0.8  
mg, Epicatechin 9 mg,  
Procyanidin dimers 7  
mg, Phloretin  
xyloglucoside 1.7 mg  
Phloridzin 8.3 mg,  
Chlorogenic acid 1  
mg, p-  
coumaroylquinic acid  
0.1 mg, Quercetin  
glycosides 46 mg,  
Quercetin 0.2 mg,  
Total pectin 2.12  
g/day

Cloudy apple juice  
(500 mL/day)

Composition:

Total polyphenols 145  
mg/day; Catechin 4.4  
mg, Epicatechin 27  
mg, Procyanidin  
dimers 55 mg,  
Phloretin  
xyloglucoside 5.4 mg  
Phloridzin 5.1 mg,  
Chlorogenic acid 40  
mg, p-  
coumaroylquinic acid  
3.2 mg, Quercetin  
glycosides 4 mg,  
Quercetin 0 mg, Total  
pectin 0.47 g/day

|                                        |                                                                                         |         |                                          |                                                                                                                                                                                                                                                                                                   |                             |                                                                                                                                                                 |
|----------------------------------------|-----------------------------------------------------------------------------------------|---------|------------------------------------------|---------------------------------------------------------------------------------------------------------------------------------------------------------------------------------------------------------------------------------------------------------------------------------------------------|-----------------------------|-----------------------------------------------------------------------------------------------------------------------------------------------------------------|
|                                        |                                                                                         |         |                                          | Clear apple juice (500 mL/day)                                                                                                                                                                                                                                                                    |                             |                                                                                                                                                                 |
|                                        |                                                                                         |         |                                          | <u>Composition:</u><br>Total polyphenols 108 mg/day; Catechin 2.3 mg, Epicatechin 19 mg, Procyanidin dimers 35 mg, Phloretin xyloglucoside 7.5 mg, Phloridzin 8.7 mg, Chlorogenic acid 27 mg, p-coumaroylquinic acid 3 mg, Quercetin glycosides 4.2 mg, Quercetin 0.4 mg, Total pectin 0.03 g/day |                             |                                                                                                                                                                 |
| Gasper et al., (2014) UK <sup>64</sup> | 25 healthy subjects (sex: 12F, 13M; age: 42 ± 11 y; BMI: 25.9 ± 4.2 kg/m <sup>2</sup> ) | 4 weeks | Randomized, three-phase crossover design | High flavanol (HF) apple puree: Standard breakfast consisting of 2 slices of white toast (72 g) with spread (10 g) followed by either, 230 g apple puree containing 100 mg epicatechin)                                                                                                           | Golden Delicious, Mitchalin | Aspirin (ASA): standard breakfast consisting of 2 slices of white toast (72 g) with spread (10 g) followed by either, aspirin (75 mg dispersed in 100 mL water) |
|                                        |                                                                                         |         |                                          | <u>Composition:</u><br>Total hydroxycinnamate–quinic acid esters 0.497 mg/g fresh weight puree; Total flavanols 2.020 mg/g; Total dihydrochalcones 0.067 mg/g; Total flavonols 0.066 mg/g                                                                                                         |                             | <u>Composition:</u><br>No polyphenols                                                                                                                           |
|                                        |                                                                                         |         |                                          | Low flavanol (LF) apple puree: Standard                                                                                                                                                                                                                                                           |                             |                                                                                                                                                                 |

|                                                      |                                                                                                                                    |         |                               |                                                                                                                                                                                           |                                               |                                                                                                                                                                      |
|------------------------------------------------------|------------------------------------------------------------------------------------------------------------------------------------|---------|-------------------------------|-------------------------------------------------------------------------------------------------------------------------------------------------------------------------------------------|-----------------------------------------------|----------------------------------------------------------------------------------------------------------------------------------------------------------------------|
|                                                      |                                                                                                                                    |         |                               | breakfast consisting of 2 slices of white toast (72 g) with spread (10 g) followed by either, 230 g apple puree containing 25 mg epicatechin                                              |                                               |                                                                                                                                                                      |
|                                                      |                                                                                                                                    |         |                               | <u>Composition:</u><br>Total hydroxycinnamate–quinic acid esters, 0.138 mg/ g fresh weight puree; Total flavanols 1.037mg/g; Total dihydrochalcones, 0.055mg/g; Total flavonols 0.095mg/g |                                               |                                                                                                                                                                      |
| Mehrabani et al., (2014) Iran <sup>54</sup>          | 34 obese childrens (age: 11.14±0.8y; BMI: above the 95th percentile based on WHO BMI-for-age charts, 27.62±2.7 kg/m <sup>2</sup> ) | 2 days  | Randomized, crossover design  | Apple juice (240mL)                                                                                                                                                                       | not reported                                  | Water (240mL)                                                                                                                                                        |
|                                                      |                                                                                                                                    |         |                               | <u>Composition:</u><br>Energy content (411.44 kcal), protein (11.3g) fat (13g), carbohydrates (65.2g), fiber (1.02g), glycemic index (42.5), glycemic load (27.70)                        |                                               | <u>Composition:</u><br>Energy content (297.74 kcal), protein (10.9g) fat (12.8g), carbohydrates (37.2g), fiber (0.5g), glycemic index (44.38), glycemic load (16.50) |
|                                                      |                                                                                                                                    |         |                               | Low fat milk (240mL)                                                                                                                                                                      |                                               |                                                                                                                                                                      |
|                                                      |                                                                                                                                    |         |                               | <u>Composition:</u><br>Energy content (401.24 kcal), protein (19.1g) fat (15.4g), carbohydrates (49.1g), fiber (0.46g), glycemic index (40.2), glycemic load (19.70)                      |                                               |                                                                                                                                                                      |
| Soriano-Maldonado et al., (2014) Spain <sup>55</sup> | 20 (12F, 8M) healthy subjects                                                                                                      | 4 weeks | Randomized, cross-over design | Apple juice (500 mL/day)                                                                                                                                                                  | Cox Orange, Jonagold, Elstar, Gala, Braeburn, | None                                                                                                                                                                 |

|                                          |                                                                                                                                                                                                                            |         |                                             |                                                                                                                                                                                                                                                                                                                                                                                                                                                                                                                                                    |                      |                 |
|------------------------------------------|----------------------------------------------------------------------------------------------------------------------------------------------------------------------------------------------------------------------------|---------|---------------------------------------------|----------------------------------------------------------------------------------------------------------------------------------------------------------------------------------------------------------------------------------------------------------------------------------------------------------------------------------------------------------------------------------------------------------------------------------------------------------------------------------------------------------------------------------------------------|----------------------|-----------------|
|                                          | <p>Polyphenol-rich apple juice group: (sex: not reported; age: 23.7±2.3 y; BMI: 21.8±2.1 kg/m<sup>2</sup>)</p> <p>Vitamin C-rich apple juice group: (sex: not reported age: 23.3±2.0y; BMI: 22.4±2.0 kg/m<sup>2</sup>)</p> |         |                                             | <p><u>Composition:</u><br/>Polyphenol-rich apple (PR) juice (Sugar: 11.0g/100g; Fiber: 0.2g/100g; vitamin C: 22mg/L; chlorogenic acid: 79.7 mg/L, Epicatechin: 33.5 mg/L; Procyanidin B2: 41.5 mg/L; Phloretin-2'-O-xyloglucoside: 34.3mg/L; Phloretin-2'-O-glucoside: 30.1mg/L)</p> <p>Vitamin C-rich apple (VCR) juice (Sugar: 10.8g/100g; Fiber: 0.1g/100g; vitamin C: 60 mg/L; chlorogenic acid: 83.8 mg/L, Epicatechin: 15.1 mg/L; Procyanidin B2: 17.3 mg/L; Phloretin-2'-O-xyloglucoside: 17.6mg/L; Phloretin-2'-O-glucoside: 13.3mg/L)</p> | Delicious and Idared |                 |
| Rago et al. (2015) Denmark <sup>56</sup> | <p>Healthy subjects</p> <p>23 (9M/14F) subjects (Age: 36.2 ± 17.9 y; BMI: 22.3 ± 2.59 kg/m<sup>2</sup>)</p>                                                                                                                | 4 weeks | Randomised, single-blinded, crossover study | Apples (550g/day)                                                                                                                                                                                                                                                                                                                                                                                                                                                                                                                                  | Shanpion             | Restricted diet |
|                                          |                                                                                                                                                                                                                            |         |                                             | <p><u>Composition:</u><br/>Total polyphenols 239 mg/day; Catechin 5.1 mg, Epicatechin 60 mg, Procyanidin dimers 81 mg, Phloretin xyloglucoside 6.2 mg, Phloridzin 6.6 mg, Chlorogenic acid 36 mg, p-coumaroylquinic acid 4 mg, Quercetin</p>                                                                                                                                                                                                                                                                                                       |                      |                 |

glycosides 41 mg,  
Quercetin 0 mg, Total  
pectin 2.87 g/day

Apple pomace  
(22mg/day)

Composition:

Total polyphenols 75  
mg/day; Catechin 0.8  
mg, Epicatechin 9 mg,  
Procyanidin dimers 7  
mg, Phloretin  
xyloglucoside 1.7 mg  
Phloridzin 8.3 mg,  
Chlorogenic acid 1  
mg, p-  
coumaroylquinic acid  
0.1 mg, Quercetin  
glycosides 46 mg,  
Quercetin 0.2 mg,  
Total pectin 2.12  
g/day

Cloudy apple juice  
(500 mL/day)

Composition:

Total polyphenols 145  
mg/day; Catechin 4.4  
mg, Epicatechin 27  
mg, Procyanidin  
dimers 55 mg,  
Phloretin  
xyloglucoside 5.4 mg  
Phloridzin 5.1 mg,  
Chlorogenic acid 40  
mg, p-  
coumaroylquinic acid  
3.2 mg, Quercetin  
glycosides 4 mg,  
Quercetin 0 mg, Total  
pectin 0.47 g/day

|                                                   |                                                                                                                |         |                                           |                                                                                                                                                                                                                                                                                                   |              |                                                                                                                                                                                                             |
|---------------------------------------------------|----------------------------------------------------------------------------------------------------------------|---------|-------------------------------------------|---------------------------------------------------------------------------------------------------------------------------------------------------------------------------------------------------------------------------------------------------------------------------------------------------|--------------|-------------------------------------------------------------------------------------------------------------------------------------------------------------------------------------------------------------|
|                                                   |                                                                                                                |         |                                           | Clear apple juice (500 mL/day)                                                                                                                                                                                                                                                                    |              |                                                                                                                                                                                                             |
|                                                   |                                                                                                                |         |                                           | <u>Composition:</u><br>Total polyphenols 108 mg/day; Catechin 2.3 mg, Epicatechin 19 mg, Procyanidin dimers 35 mg, Phloretin xyloglucoside 7.5 mg, Phloridzin 8.7 mg, Chlorogenic acid 27 mg, p-coumaroylquinic acid 3 mg, Quercetin glycosides 4.2 mg, Quercetin 0.4 mg, Total pectin 0.03 g/day |              |                                                                                                                                                                                                             |
| Bondonno et al., (2018) Australia <sup>65</sup>   | 30 healthy subjects with cardiovascular risk (10M, 20F; age: 57.8 ± 10.6y; BMI: 27.5 ± 3.9 kg/m <sup>2</sup> ) | 4 weeks | Randomised, controlled, cross-over design | High-flavonoid apple (HFA) (1 whole apple plus the skin + 1 apple blended with water)                                                                                                                                                                                                             | Cripps Pink  | Low-flavonoid apple (LFA) (1 Cripps Pink apple blended with water)                                                                                                                                          |
|                                                   |                                                                                                                |         |                                           | <u>Composition :</u><br>total phenolic compounds (306 mg/day); total quercetin glucosides (195.3mg/day) ; Epicatechin (48.0 mg/day); Phloridzin (5.1 mg/day); Chlorogenic acid (52.1mg/day); anthocyanins (6 mg/day)                                                                              |              | <u>Composition:</u><br>Total phenolic compounds (92 mg/day); total quercetin glucosides (12.5mg/day) ; Epicatechin (25.2 mg/day); Phloridzin (2.2 mg/day); Chlorogenic acid (52.1mg/day); anthocyanins (ND) |
| Eisner et al., (2019) United States <sup>57</sup> | 38 overweight or obese children (sex: both but info not reported; age range: 10-16 years;                      | 8 weeks | Randomized, controlled, parallel design   | Dried apple (equivalent to 120 kcal twice per day)                                                                                                                                                                                                                                                | Not provided | Snack (muffin, equivalent to 120 kcal twice per day)                                                                                                                                                        |

|                                           |                                                                              |         |                                    |                                                                                                                                                                                                                                                                                                                                                                                                                                                                                                                                                                                                                          |         |                                                                                                |
|-------------------------------------------|------------------------------------------------------------------------------|---------|------------------------------------|--------------------------------------------------------------------------------------------------------------------------------------------------------------------------------------------------------------------------------------------------------------------------------------------------------------------------------------------------------------------------------------------------------------------------------------------------------------------------------------------------------------------------------------------------------------------------------------------------------------------------|---------|------------------------------------------------------------------------------------------------|
|                                           | BMI: >85th percentile for overweight, and >95th percentile for obese)        |         |                                    | <u>Composition:</u><br>240 kcal energy, 0 g fat, 59 g carbohydrate, 0.8 g protein, and 8 g fiber. 732 µg gallic acid equivalent per gram                                                                                                                                                                                                                                                                                                                                                                                                                                                                                 |         | <u>Composition:</u><br>240 kcal energy, 0 g fat, 55 g carbohydrate, 4 g protein, and 0 g fiber |
| Tenore et al., (2019) Italy <sup>58</sup> | 90 subjects with cardiovascular risk factors                                 | 90 days | 3-arm, randomized, parallel design | lfAAP, 125g/day)                                                                                                                                                                                                                                                                                                                                                                                                                                                                                                                                                                                                         | Annurca | Probiotic alone (LAB, 1 capsule/day)                                                           |
|                                           | <u>lfAAP group</u><br>(sex: 12W, 18M; Age: 45.8 ± 11.1 y; BMI: not reported) |         |                                    | <u>Composition:</u><br>Chrogenic acid 10.78mg, [+]-Catechin 1.52mg, [-]-Epicatechin 3.48mg, Procyanidin B1 1.01mg, Procyanidin B2 2.58, Procyanidin trimer 1.87mg, Cyanidin-3-O-galactoside 0.05mg, Rutin (Quercetin-3-O-rutinoside) 1.08mg, Hyperin (Quercetin-3-O-galactoside) 12.1mg, Isoquercitrin (Quercetin-3-O-glucoside) 4.75mg, Reynoutrin (Quercetin-3-O-xyloside) 2.75mg, Guajaverin (Quercetin 3-O-arabinopyranoside) 2.35mg, Avicularin (Quercetin 3-O-arabinofuranoside) 5.35mg, Quercetin-O-pentoside 1.65mg, Quercitrin (Quercetin-3-O-rannoside) 3.16mg, Phloretin-2-O-xyloglucoside 3.78mg, Phloridzin |         | <u>Composition:</u><br>Lactobacillus rhamnosus (3.0 x 10 <sup>8</sup> CFU).                    |
|                                           | <u>AAP group</u><br>(sex: 13W, 17M; Age: 46.9 ± 10.6 y; BMI: not reported)   |         |                                    |                                                                                                                                                                                                                                                                                                                                                                                                                                                                                                                                                                                                                          |         |                                                                                                |
|                                           | <u>LAB group</u><br>(sex: 14W, 16M; Age: 47.6 ± 10.4 y; BMI: not reported)   |         |                                    |                                                                                                                                                                                                                                                                                                                                                                                                                                                                                                                                                                                                                          |         |                                                                                                |

(phloretin-2-O-glucoside) 4.23mg,  
Total polyphenols  
62.40mg

Unfermented apple  
puree (AAP,  
125g/day)

Composition:

Chroogenic acid  
8.98mg, [+]-Catechin  
1.20mg, [-]-  
Epicatechin 2.80mg,  
Procyanidin B1  
0.70mg, Procyanidin  
B2 1.78, Procyanidin  
trimer 1.28mg,  
Cyanidin-3-O-  
galactoside 0.04mg,  
Rutin (Quercetin-3-O-  
rutinoside) 0.80mg,  
Hyperin (Quercetin-3-  
O-galactoside)  
8.90mg, Isoquercitrin  
(Quercetin-3-O-  
glucoside) 3.52mg,  
Reynoutrin  
(Quercetin-3-O-  
xyloside) 2.04mg,  
Guajaverin (Quercetin  
3-O-  
arabinopyranoside)  
1.74mg, Avicularin  
(Quercetin  
3-O-  
arabinofuranoside)  
3.96mg, Quercetin-O-  
pentoside 1.22mg,  
Quercitrin (Quercetin-  
3-O-rannoside)  
2.34mg, Phloretin-2-  
O-xyloglucoside  
2.70mg, Phloridzin  
(phloretin-2-O-

|                                                     |                                                                                                                |         |                                          |                                                                                                                                                                                                                                                                                        |                                    |                                                                                                                                                                                                                                                                                               |
|-----------------------------------------------------|----------------------------------------------------------------------------------------------------------------|---------|------------------------------------------|----------------------------------------------------------------------------------------------------------------------------------------------------------------------------------------------------------------------------------------------------------------------------------------|------------------------------------|-----------------------------------------------------------------------------------------------------------------------------------------------------------------------------------------------------------------------------------------------------------------------------------------------|
| Giaretta et al., (2019)<br>Brazil <sup>59</sup>     | 16 haemodialysis subjects (10M, 6F; age: 54.4 ± 11.5y; BMI: 28.6 ± 4.1 kg/m <sup>2</sup> )                     | 1 week  | Pre-to-post intervention                 | glucoside) 3.02mg,<br>Total polyphenols 47.02mg                                                                                                                                                                                                                                        | 2 apples (~360 g/day) Fuji         | none                                                                                                                                                                                                                                                                                          |
|                                                     |                                                                                                                |         |                                          | <u>Composition :</u><br>total phenolic (88mg/ equivalent gallic acid), total flavanol (15mg/ mg eq. Catechin), total monomeric anthocyanin (4mg/ cyanidin 3-glucoside), FRAP (168.77mg/ equivalent gallic acid), DPPH (58.28mg/equivalent gallic acid)                                 |                                    |                                                                                                                                                                                                                                                                                               |
| Koutsos et al., (2020)<br>UK <sup>4</sup>           | 40 healthy mildly hypercholesterolemic subjects (sex: 23F,17M; age: 51±11 y; BMI: 25.3±3.7 kg/m <sup>2</sup> ) | 8 weeks | Randomized, controlled, crossover design | Apples (n=2, 340g daily serving without the core including skin)                                                                                                                                                                                                                       | Renetta Canada                     | Control beverage (100-mL) + water 400 mL daily serving (sugar-matched control)                                                                                                                                                                                                                |
|                                                     |                                                                                                                |         |                                          | <u>Composition:</u><br>Energy 221 kcal, fat 0.7g, protein 1g, total carbohydrates 58g, total sugars 44g, total dietary fiber 8.5g, vitamin C 21mg, sum of all individual polyphenols and oligomeric PAs (DP > 2) 990 mg per daily portion (mainly oligomeric Pas and chlorogenic acid) |                                    | <u>Composition:</u><br>Energy 167 kcal, fat <0.1g, protein <0.1g, total carbohydrates 42g, total sugars 41g, total dietary fiber <0.5g, vitamin C <0.3mg, sum of all individual polyphenols and oligomeric PAs (DP > 2) 2.5 mg per daily portion (mainly oligomeric Pas and chlorogenic acid) |
| Barnett et al., (2021)<br>New Zealand <sup>60</sup> | 30 healthy volunteers (25F, 5M; age range                                                                      | 2 weeks | Randomized, placebo-controlled,          | Dried slice of red-fleshed apple (one                                                                                                                                                                                                                                                  | Test apples : plant-food selection | Dried slice of placebo apples with pale skin                                                                                                                                                                                                                                                  |

|                                                  |                                                                                                               |         |                                                    |                                                                                                                                                                                                                                                                                                                                                                                                                                                                                                                                                |                                                 |                                                                                                                                                                                                                                                                                                                                                                                                                                                                                                                         |
|--------------------------------------------------|---------------------------------------------------------------------------------------------------------------|---------|----------------------------------------------------|------------------------------------------------------------------------------------------------------------------------------------------------------------------------------------------------------------------------------------------------------------------------------------------------------------------------------------------------------------------------------------------------------------------------------------------------------------------------------------------------------------------------------------------------|-------------------------------------------------|-------------------------------------------------------------------------------------------------------------------------------------------------------------------------------------------------------------------------------------------------------------------------------------------------------------------------------------------------------------------------------------------------------------------------------------------------------------------------------------------------------------------------|
|                                                  | 20-61y; BMI range<br>19.4-30.8 kg/m <sup>2</sup> )                                                            |         | crossover<br>intervention trial                    | apple/day)                                                                                                                                                                                                                                                                                                                                                                                                                                                                                                                                     | A194R31T068,<br>A236R02T092, and<br>A358R02T100 | and white flesh                                                                                                                                                                                                                                                                                                                                                                                                                                                                                                         |
| Liddle et al., (2021)<br>Canada <sup>61</sup>    | 44 overweight and<br>obese subjects<br>(sex:30F, 14M; age:<br>45.4±2.2y; BMI:<br>33.4±0.9 kg/m <sup>2</sup> ) | 6 weeks | Randomized,<br>controlled, parallel-<br>arm design | Apple fruit (3 x day;<br>~200 g edible parts)<br><br><u>Composition :</u><br>Energy 115 kcal,<br>Carbohydrates 27.5 g<br>(3.3 g glucose, 11.9 g<br>fructose, 5.6 g<br>sucrose), Protein 1.2<br>g, Fat 0 g, Pectin 2.2g,<br>Total polyphenols<br>200mg                                                                                                                                                                                                                                                                                          | Placebo apples :<br>PremA153<br>Gala            | Habitual diet without<br>apples                                                                                                                                                                                                                                                                                                                                                                                                                                                                                         |
| Pushpass et al.,<br>(2023) Ireland <sup>66</sup> | 61 volunteers (sex:<br>46F, 15M ; age: 52±12<br>y; BMI 24.8±3.4<br>kg/m <sup>2</sup> )                        | 8 weeks | 4 arms, randomized,<br>parallel design             | Apple treatment (2<br>Renetta Canada<br>apples with 2 placebo<br>capsules) consumed<br>daily for breakfast<br>(high fat chocolate<br>drink)<br><br><u>Composition:</u><br>Apple:<br>(Energy 234kcal,<br>Carbohydrates 63.5g,<br>(sugars 44g), Protein<br>1.1g, Fat 0.7g, Fiber<br>8.5g, vitamin C 21mg,<br>sum of all individual<br>polyphenols and<br>oligomeric PAs (DP ><br>2) 990 mg per daily<br>portion (mainly<br>oligomeric Pas and<br>chlorogenic acid))<br><br>Test Breakfast<br>Apples:<br>(Energy 845kcal,<br>Carbohydrates 88.8g, | Renetta Canada                                  | Control treatment<br>(Cornflakes 40 g with<br>180 mL semi-<br>skimmed milk and 2<br>placebo capsules)<br>consumed daily for<br>breakfast (high fat<br>chocolate drink)<br><br><u>Composition:</u><br>Test Breakfast<br>Control:<br>(Energy 852kcal,<br>Carbohydrates 86g,<br>(sugars 46.6g),<br>Protein 19.2g, Fat<br>50.3g, Fiber 1.4g)<br><br>Probiotic treatment<br>(Cornflakes 40g with<br>180 mL semi-<br>skimmed milk and 2<br>probiotic capsules<br>containing the BSH<br>positive strain of L.<br>reuteri NCIMB |

|                                                      |                                                                                         |         |                                                                 |                                                                                                |              |                                                                                                                                                            |
|------------------------------------------------------|-----------------------------------------------------------------------------------------|---------|-----------------------------------------------------------------|------------------------------------------------------------------------------------------------|--------------|------------------------------------------------------------------------------------------------------------------------------------------------------------|
|                                                      |                                                                                         |         |                                                                 | (sugars 69g), Protein 19.3g, Fat 50.1g, Fiber 8.5g)                                            |              | 30242, >2.5 billion CFU per capsule) consumed daily for breakfast (high fat chocolate drink)                                                               |
|                                                      |                                                                                         |         |                                                                 |                                                                                                |              | <u>Composition:</u><br>Test Breakfast Probiotic:<br>(Energy 852kcal, Carbohydrates 86g, (sugars 46.6g), Protein 19.2g, Fat 50.3g, Fiber 1.4g)              |
|                                                      |                                                                                         |         |                                                                 |                                                                                                |              | Oats treatment (Jumbo whole rolled oats 40 g with 180 mL semi-skimmed milk and 2 placebo capsules) consumed daily for breakfast (high fat chocolate drink) |
|                                                      |                                                                                         |         |                                                                 |                                                                                                |              | <u>Composition:</u><br>Test Breakfast Oats:<br>(Energy 864kcal, Carbohydrates 88.1g, (sugars 63.1g), Protein 19.8g, Fat 49.6g, Fiber 3.6g)                 |
| Alexander et al., (2023) United States <sup>62</sup> | 90 healthy adults (77F, 23M; age range: 18-61y; BMI range:17.9-47.1 kg/m <sup>2</sup> ) | 4 weeks | Randomized, double-blinded, placebo-controlled, parallel design | Apple juice 16oz or apple juice (16oz) + apple pomace (10g)                                    | not reported | none                                                                                                                                                       |
|                                                      |                                                                                         |         |                                                                 | <u>Composition :</u><br>Apple juice (0 g fibre/d)<br>Apple juice + apple pomace (10 g fibre/d) |              |                                                                                                                                                            |

---

|                                                    |                                                                                             |         |                                        |                                                                                                                                                                                                                                                                                                                |                |                                                                                                                                                                                                                                                                                     |
|----------------------------------------------------|---------------------------------------------------------------------------------------------|---------|----------------------------------------|----------------------------------------------------------------------------------------------------------------------------------------------------------------------------------------------------------------------------------------------------------------------------------------------------------------|----------------|-------------------------------------------------------------------------------------------------------------------------------------------------------------------------------------------------------------------------------------------------------------------------------------|
| Alzoufairy et al.,<br>(2025) Ireland <sup>63</sup> | 59 healthy volunteers                                                                       | 8 weeks | 4 arms, randomized,<br>parallel design | Apple treatment (2<br>Renetta Canada<br>apples with 2 placebo<br>capsules) consumed<br>daily for breakfast<br>(high fat chocolate<br>drink)                                                                                                                                                                    | Renetta Canada | Control treatment<br>(Cornflakes 40 g with<br>180 mL semi-<br>skimmed milk and 2<br>placebo capsules)<br>consumed daily for<br>breakfast (high fat<br>chocolate drink)                                                                                                              |
|                                                    | <u>Apple group:</u> (sex:<br>12F, 3M ; age: 54±3 y;<br>BMI 25.5±0.9 kg/m <sup>2</sup> )     |         |                                        | <u>Composition:</u><br>Apple:<br>(Energy 234kcal,<br>Carbohydrates 63.5g,<br>(sugars 44g), Protein<br>1.1g, Fat 0.7g, Fiber<br>8.5g, vitamin C 21mg,<br>sum of all individual<br>polyphenols and<br>oligomeric PAs (DP ><br>2) 990 mg per daily<br>portion (mainly<br>oligomeric Pas and<br>chlorogenic acid)) |                | <u>Composition:</u><br>Test Breakfast<br>Control:<br>(Energy 852kcal,<br>Carbohydrates 86g,<br>(sugars 46.6g),<br>Protein 19.2g, Fat<br>50.3g, Fiber 1.4g)                                                                                                                          |
|                                                    | <u>Oat group:</u> (sex: 12F,<br>3M ; age: 50±3 y; BMI<br>25.5±0.9 kg/m <sup>2</sup> )       |         |                                        | Test Breakfast<br>Apples:<br>(Energy 845kcal,<br>Carbohydrates 88.8g,<br>(sugars 69g), Protein<br>19.3g, Fat 50.1g,<br>Fiber 8.5g)                                                                                                                                                                             |                | Probiotic treatment<br>(Cornflakes 40g with<br>180 mL semi-<br>skimmed milk and 2<br>probiotic capsules<br>containing the BSH<br>positive strain of L.<br>reuteri NCIMB<br>30242, >2.5 billion<br>CFU per capsule)<br>consumed daily for<br>breakfast (high fat<br>chocolate drink) |
|                                                    | <u>Probiotic group:</u> (sex:<br>11F, 4M ; age: 53±3 y;<br>BMI 24.2±0.9 kg/m <sup>2</sup> ) |         |                                        |                                                                                                                                                                                                                                                                                                                |                | <u>Composition:</u><br>Test Breakfast<br>Probiotic:<br>(Energy 852kcal,<br>Carbohydrates 86g,<br>(sugars 46.6g),<br>Protein 19.2g, Fat<br>50.3g, Fiber 1.4g)                                                                                                                        |
|                                                    | <u>Control group:</u> (sex:<br>10F, 4M ; age: 50±3 y;<br>BMI 24.7±0.9 kg/m <sup>2</sup> )   |         |                                        |                                                                                                                                                                                                                                                                                                                |                | Oats treatment<br>(Jumbo whole rolled<br>oats 40 g with 180                                                                                                                                                                                                                         |

---

mL semi-skimmed  
milk and 2  
placebo capsules)  
consumed daily for  
breakfast (high fat  
chocolate drink)

Composition:  
Test Breakfast Oats:  
(Energy 864kcal,  
Carbohydrates 88.1g,  
(sugars 63.1g),  
Protein 19.8g, Fat  
49.6g, Fiber 3.6g)

---

Legend: BMI: body mass index; F: female; M, male;
